# Supplementary material
Source: PubMed Central journal article supplement (PMC3679320)

Supplemental Digital Content 1 for Psychosomatic Medicine

Beydoun et. al, *Helicobacter pylori* seropositivity and cognitive performance among US adults: evidence from a large national survey

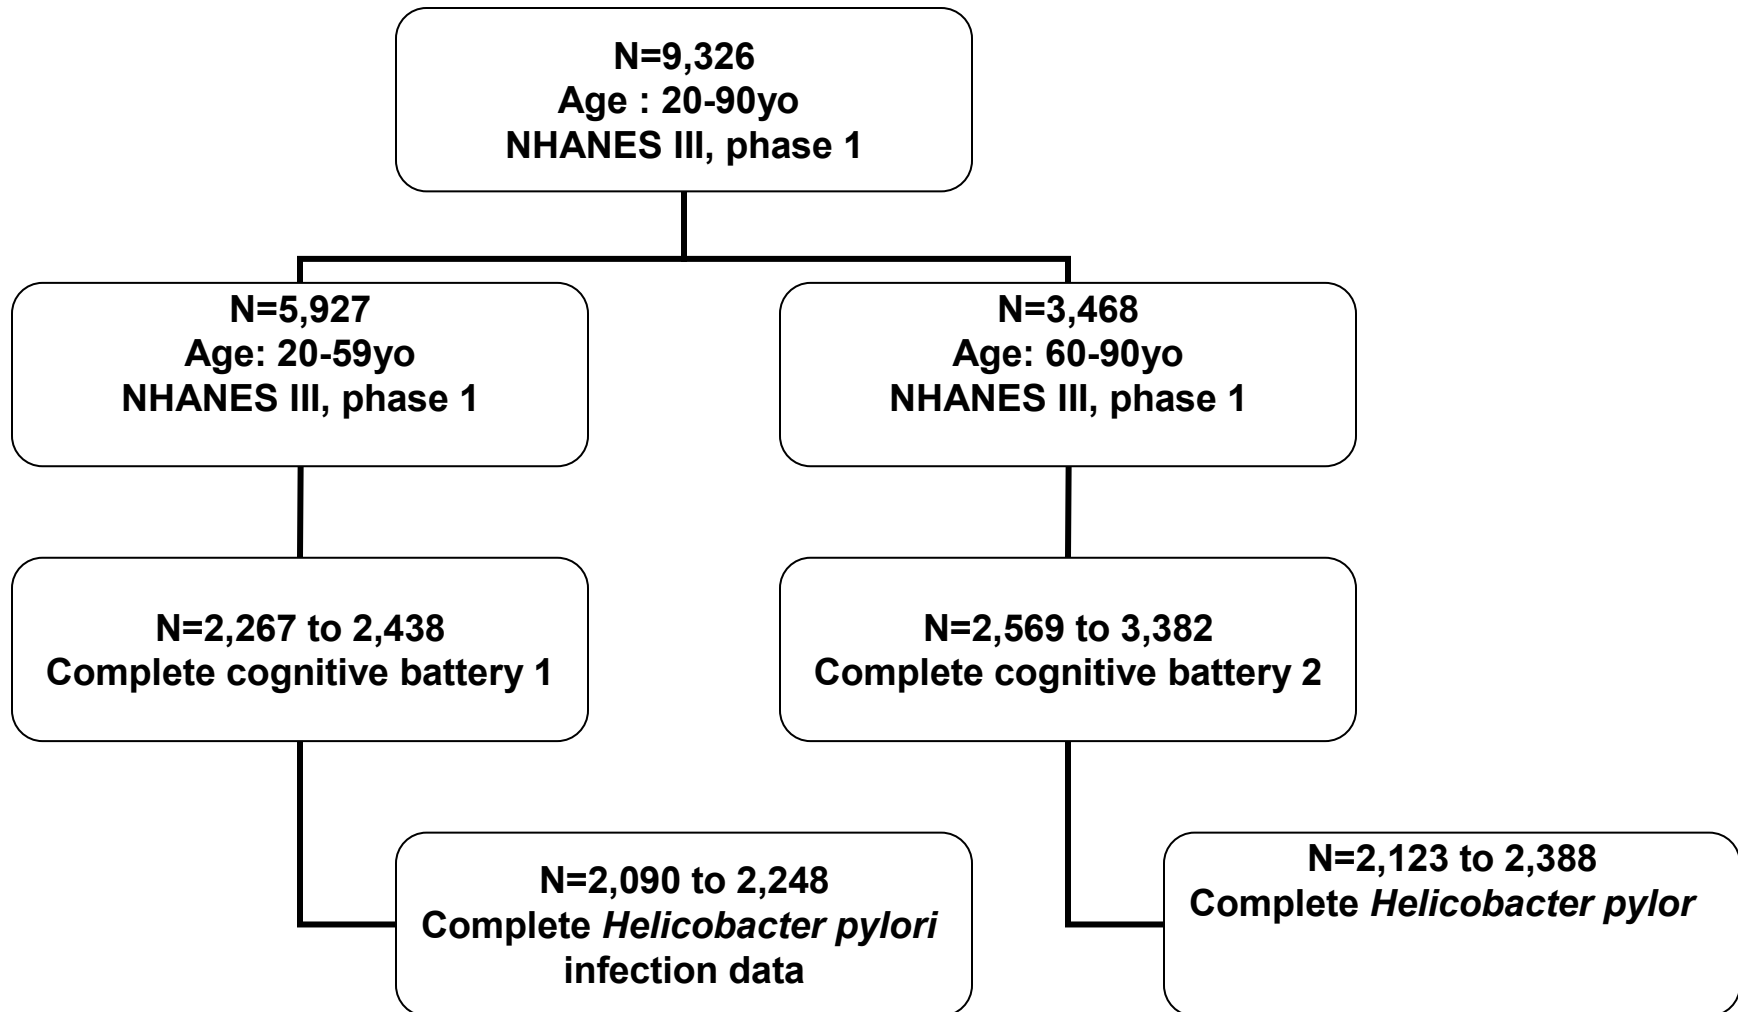

Supplement: NIHMS465555-supplement-1.pdf [file NIHMS465555-supplement-1.pdf]
